# Supplementary material for: Preparation of TiO2–Pt hybrid nanofibers and their application for sensitive hydrazine detection
Source: Royal Society of Chemistry journal article supplement (doi:10.1039/c0nr00773k), 2011-01-01
Supplement: C0NR00773K.PDF [file C0NR00773K.PDF]

**Supplementary Materials:**

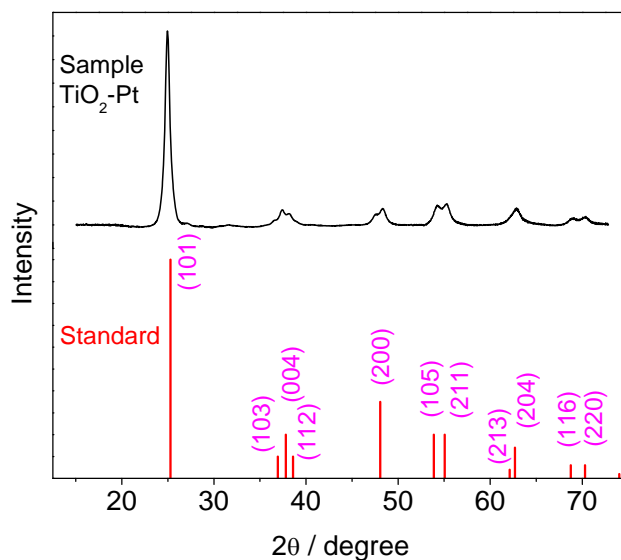

Figure S1. XRD patterns for the standard values of JCPDS No.21-1272 and TiO<sub>2</sub>-Pt nanofibers obtained by calcining Pt(OAc)<sub>2</sub>-TiO<sub>2</sub>-PVP nanofibers in air at 500 °C for 3h.

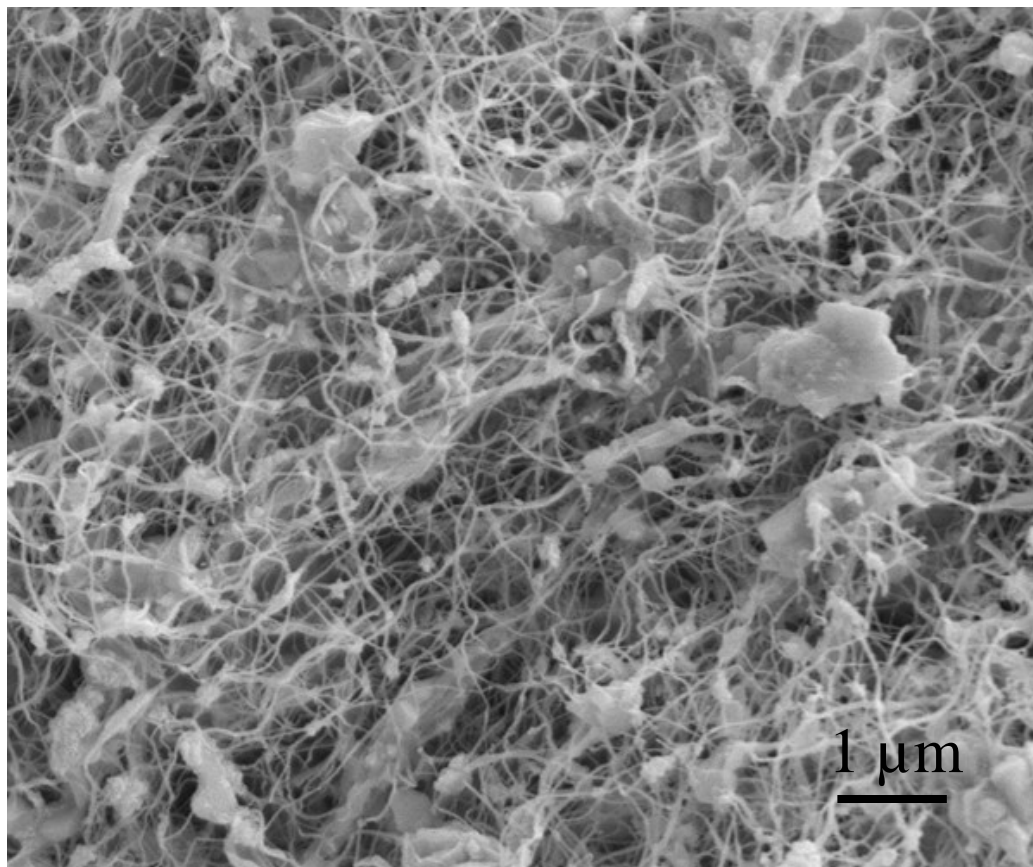

Figure S2. SEM image of Pt nanofibers obtained by calcining  $\text{Pt}(\text{OAc})_2$ -PVP nanofibers in air at 500 °C for 3h.

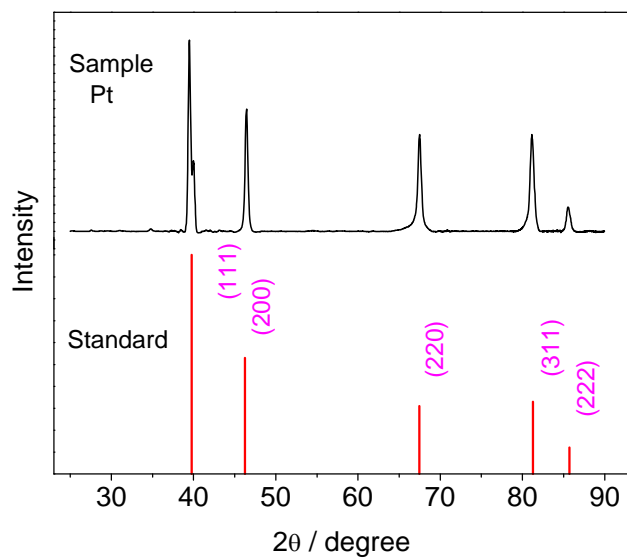

Figure S3. XRD patterns for the standard values of JCPDS No.04-0802 and Pt obtained by calcining  $\text{Pt}(\text{OAc})_2$ -PVP nanofibers in air at 500 °C for 3 h.
